# Supplementary material for: Polymer-Based Additive Manufacturing for Orthotic and Prosthetic Devices: Industry Outlook in Canada
Source: MDPI journal article supplement (doi:10.3390/polym15061506), 2023-03-17
Supplement: s1 [file s1]

# Supplementary Materials

## Section S1: List of O&P Professionals Interviewed

**Table S1.** Interview list of O&P Professionals.

| Serial | Name                                                          | Organization                                                                                     | Interview Date (CST) |
|--------|---------------------------------------------------------------|--------------------------------------------------------------------------------------------------|----------------------|
| 1      | Adriel Lau, (CP)c                                             | BC Prosthetic & Orthotic Services (Kelowna, BC)                                                  | 5/26/2022 8:00 AM    |
| 2      | Andrew Litner, (CPO)c                                         | PBO Group (St. Catharines, ON)                                                                   | 6/6/2022 10:30 AM    |
| 3      | Angela Creighton-Leroux, (CPO)c                               | Kelowna General Hospital (Kelowna, BC)                                                           | 5/10/2022 1:00 PM    |
| 4      | Bradley Van Lenthe, (CP)c                                     | Freedom Prosthetics (Woodbridge, ON)                                                             | 5/9/2022 11:30 AM    |
| 5      | Brittany Pousett, (CP)c                                       | Barber Prosthetics Clinic Inc. (Vancouver, BC)                                                   | 5/12/2022 12:30 PM   |
| 6      | Calvin Ngan, Researcher, PhD Candidate, University of Toronto | Holland Bloorview Kids Rehab Hospital (Toronto, ON)                                              | 5/24/2022 1:00 PM    |
| 7      | Carl Ganzert, (CO)c                                           | Hodgson Orthopedic Group (Surrey, BC)                                                            | 6/7/2022 2:00 PM     |
| 8      | Christina Fung, (CP)c                                         | Sunnybrook Centre for Independent Living (Toronto, ON)                                           | 5/19/2022 11:30 AM   |
| 9      | David Moe, (CP)c                                              | Barber Prosthetics Clinic Inc. (Vancouver, BC)                                                   | 5/12/2022 3:00 PM    |
| 10     | Duane Nelson, (CP)c                                           | Synergy Prosthetic Services Inc (Edmonton, AB)                                                   | 5/27/2022 9:00 AM    |
| 11     | Hossein Gholizadeh, (CP)c                                     | Ampos Orthopaedics (Ottawa, ON)                                                                  | 5/24/2022 11:00 AM   |
| 12     | Jenna Barnert, (CP)c                                          | Cascade Prosthetic Services Ltd. (Calgary, AB)                                                   | 5/27/2022 3:00 PM    |
| 13     | Jeremy Nokes, (CP)c                                           | PBO Group (St. Catharines, ON)                                                                   | 5/17/2022 7:00 AM    |
| 14     | Laura Trevelin, (RTP)c                                        | Nova Scotia Rehabilitation and Arthritis Center (Halifax, NS)                                    | 6/8/2022 9:30 AM     |
| 15     | Loren Schubert, (CP)c<br>Head of O&P Program at BCIT          | British Columbia Institute of Technology (Burnaby, BC),<br>Hodgson Orthopedic Group (Surrey, BC) | 5/26/2022 3:30 PM    |
| 16     | Louis Janzé, (CP)c                                            | Fraser Valley Prosthetics Ltd. (Abbotsford, BC)                                                  | 5/19/2022 4:00 PM    |
| 17     | Malena Rapaport, (CP)c                                        | Barber Prosthetics Clinic Inc. (Vancouver, BC)                                                   | 5/20/2022 10:30 AM   |
| 18     | Michael Pearce, (CP)c                                         | Ottobock Healthcare Canada Ltd (Burlington, ON)                                                  | 6/15/2022 6:30 AM    |
| 19     | Michael Prystai, (CPO)c                                       | Vancouver Prosthetics & Orthotics Inc. (Vancouver, BC)                                           | 5/12/2022 11:30 AM   |
| 20     | Steve Scott, (CP)c                                            | Cascade Prosthetic Services Ltd. (Calgary, AB)                                                   | 5/10/2022 1:15 PM    |
| 21     | Tania Chabot (Gripper), (CP)c and (RTP)c                      | Russell Prosthetics Ltd. (New Westminster, BC)                                                   | 6/2/2022 9:30 AM     |
| 22     | Tessa Richardson, (CP)c                                       | Barber Prosthetics Clinic Inc. (Vancouver, BC)                                                   | 5/13/2022 9:00 AM    |

## Section S2: Interview Questionnaire

### ▪ *Preliminary Profile Questions*

- Can you state your name please?
- What is the name of your company?
- How many years have you worked in this industry?

### ▪ *Job/Position*

- What are your roles and responsibilities ?

### ▪ *Identification and determination of the Severity of the Problem*

- Which process/technique is used in your facility for manufacturing prosthesis or orthosis (hand casting/ digital scanning or any other method)?
- What materials are used for the manufacture of diagnostic socket?
- What materials are used for the manufacture of definitive socket?
- What are the problems you are having while manufacturing prosthesis or orthosis?
- What issues do the patients face with the prosthesis or orthosis that are made using the current process?
- If you have problems with your current manufacturing process, how often would you say these problems occur? Do these problems cost your business time or money?
- Have you researched other types of technology regarding manufacturing of prosthesis or orthosis? Have you tried 3D printing so far?
- If you are familiar with the 3D printed prosthesis or orthosis, what is your opinion on that? (like concerns, issues, advantages etc)

### ▪ *Channels*

- Who are the current suppliers of prosthetics materials, components and accessories?

### ▪ *Revenue Streams*

- What is the usual range for the cost of the upper limb prostheses?
- What is the usual range for the cost of the lower limb prostheses?
- How often do you upgrade your technology?

### ▪ *Customer Relationships*

- When was the last time you purchased/integrated a product/technology for manufacturing prosthesis or orthosis?

### ▪ *Success metrics.*

- What do/did you consider (i.e. features) when looking for manufacturing the best prosthesis or orthosis?
